# Supplementary material
Source: PubMed Central journal article supplement (PMC6279524)
Supplement: NIHMS1506381-supplement-1.pdf [file NIHMS1506381-supplement-1.pdf]

## Supplemental Figure. Time from index release to death from any cause

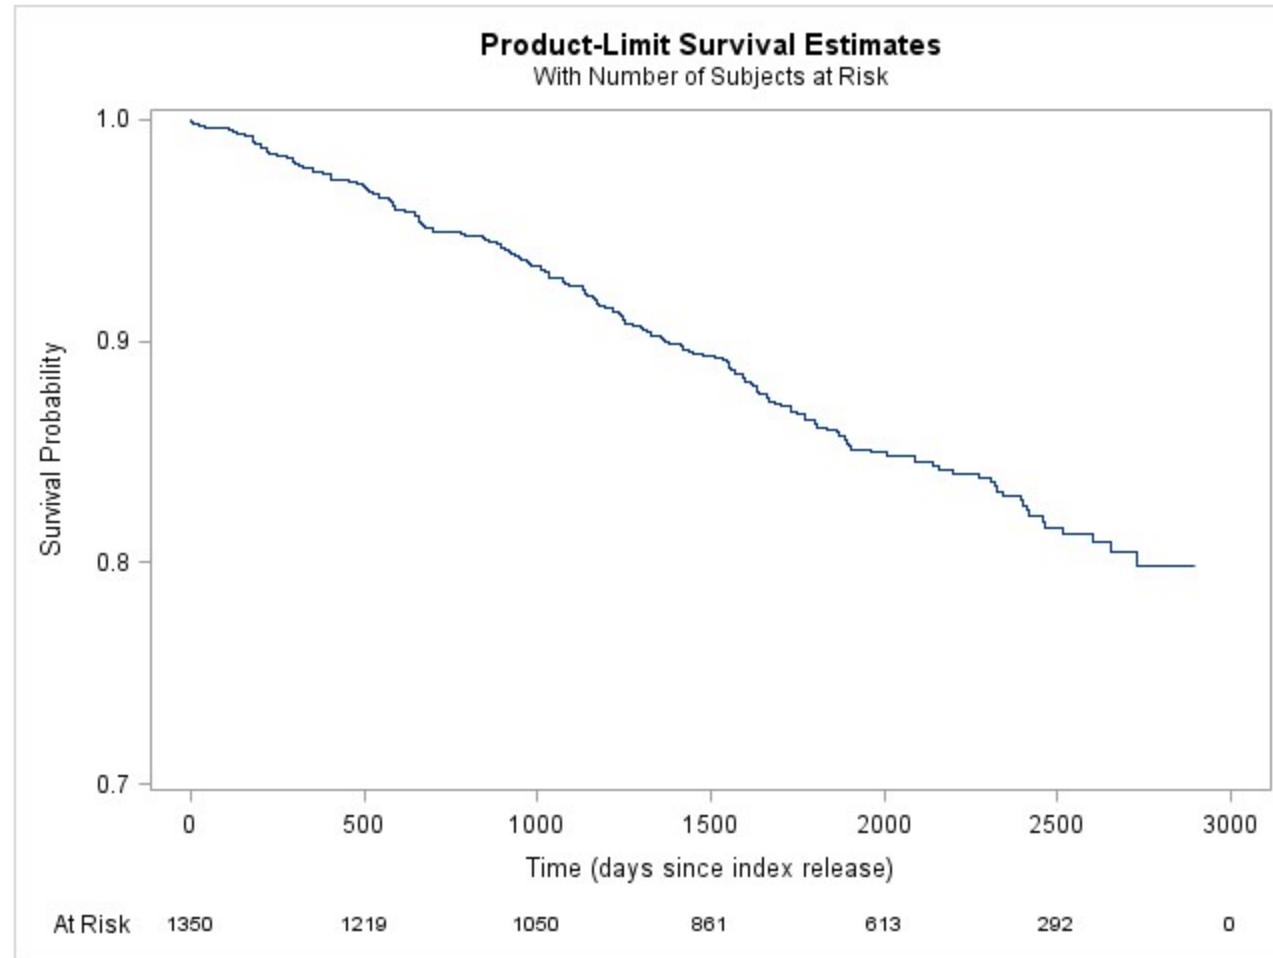

**Supplementary Table 1. ICD-10 codes for causes of death**

| Classification                              | ICD-10 Code                                                                                                                |
|---------------------------------------------|----------------------------------------------------------------------------------------------------------------------------|
| AIDS OI- Aspergillosis                      | B44.1                                                                                                                      |
| AIDS OI- Bacterial infection                | B20.1                                                                                                                      |
| AIDS OI- Candidiasis                        | B37.1, B37.8, B37.9                                                                                                        |
| AIDS OI- Cryptococcosis                     | B45.1, B45.7, B45.9                                                                                                        |
| AIDS OI- Herpes                             | B00.9                                                                                                                      |
| AIDS OI- Kaposi sarcoma                     | B21.0, C46.7, C46.9                                                                                                        |
| AIDS OI- Mycosis (unspecified)              | B20.5, B49                                                                                                                 |
| AIDS OI- Neoplasm                           | B21.3, B21.7, B21.8, B21.9                                                                                                 |
| AIDS OI- NHL                                | B21.2, C83.3, C85.9                                                                                                        |
| AIDS OI- PML                                | A81.2                                                                                                                      |
| AIDS OI- Pneumocystosis                     | B59                                                                                                                        |
| AIDS OI- Pneumonia                          | J15.4, J18.0, J18.1, J18.9                                                                                                 |
| AIDS OI- Tuberculosis or other Mycobacteria | A16.9, B20.0, B90.9                                                                                                        |
| AIDS OI- Infection (other)                  | B20.3, B20.7, B20.8, B20.9                                                                                                 |
| Acidosis                                    | E87.2                                                                                                                      |
| Anoxic brain damage or compression          | G93.1, G93.5                                                                                                               |
| Aortic dissection                           | I71.0                                                                                                                      |
| Assault (homicide)                          | X95, X99, Y09                                                                                                              |
| Crohn's Disease                             | K50.9                                                                                                                      |
| Lung disease (other than malignancy)        | J43.9, J44.9, J47, J84.1, J98.4                                                                                            |
| Cardiac arrest                              | I46.9                                                                                                                      |
| Cardiogenic shock                           | I31.3, R57.0                                                                                                               |
| Coagulation defect (unspecified)            | D68.9                                                                                                                      |
| Hyperkalemia                                | E87.5                                                                                                                      |
| Diabetes                                    | E14.1, E14.2, E14.9                                                                                                        |
| Disseminated intravascular coagulation      | D65                                                                                                                        |
| Dementia (unspecified)                      | F03                                                                                                                        |
| Endocarditis                                | I33.0, I33.9, I38                                                                                                          |
| Exposure- hypothermia                       | T68, T69.9, X31                                                                                                            |
| Gallbladder disease                         | K82.9                                                                                                                      |
| HIV                                         | B20.0, B20.1, B20.3, B20.5, B20.7, B20.8, B20.9, B21.3, B21.7, B21.8, B21.9, B22.0, B22.7, B23.2, B23.8, B24, D84.9, D89.9 |
| HIV encephalopathy                          | B22.0, G93.4                                                                                                               |
| Cardiovascular disease                      | I05.9, I10, I11.9, I20.9, I21.9, I25.0, I25.1, I27.2, I27.9, I42.0, I42.9, I45.8, I49.9, I50.0, I51.7                      |
| Hematologic disorder                        | D61.9, D69.5                                                                                                               |

|                                                      |                                                                                                                     |
|------------------------------------------------------|---------------------------------------------------------------------------------------------------------------------|
| Hemorrhage (gastrointestinal)                        | K66·1, K92·0, K92·2, I85·0                                                                                          |
| Hemorrhage (respiratory)                             | R04·8                                                                                                               |
| Hemorrhage (unspecified)                             | R58·0                                                                                                               |
| Hepatitis B- Acute                                   | B16·9                                                                                                               |
| Hepatitis C- Chronic                                 | B18·2                                                                                                               |
| Hypotension, unspecified                             | I95·9                                                                                                               |
| Viral infection (unspecified)                        | B34·9                                                                                                               |
| Infection (unspecified)                              | B99                                                                                                                 |
| Kidney disease/failure                               | I12·0, N17·9, N18·5, N18·9, N19, N28·8                                                                              |
| Liver cell carcinoma                                 | C22·0                                                                                                               |
| Liver failure, secondary to alcohol abuse/dependence | K70·3                                                                                                               |
| Hepatorenal syndrome                                 | K76·7                                                                                                               |
| Liver disease/failure                                | K72·9, K74·6, K75·9, K76·9                                                                                          |
| Bacterial infection                                  | A49·9, G00·9                                                                                                        |
| Septicemia                                           | A41·0, A41·9                                                                                                        |
| Infection (other)                                    | M86·9, N39·0, L02·1                                                                                                 |
| Cause not specified                                  | R99                                                                                                                 |
| Malignancy (other)                                   | C18·9, C20, C22·1, C32·9, C34·9, C67·9, C78·7, C79·5, C79·8, C80                                                    |
| Pneumonitis                                          | J69·0                                                                                                               |
| Drug overdose                                        | X42, X44, Y14                                                                                                       |
| Poisoning (and/or abuse/dependence)- Alcohol         | F10·1, F10·2, F10·9, T51·0, T51·9, X45                                                                              |
| Poisoning- Benzodiazepines                           | T42·4                                                                                                               |
| Poisoning (and/or abuse/dependence)- Cocaine         | F14·1, T40·5                                                                                                        |
| Poisoning- Opioids (heroin)                          | T40·1                                                                                                               |
| Poisoning- Opioids (methadone)                       | T40·3                                                                                                               |
| Poisoning- Opioids (narcotics)                       | X42                                                                                                                 |
| Poisoning (and/or abuse dependence)- Opioids (other) | F11·9, T40·2, T40·6                                                                                                 |
| Poisoning- Opioids (synthetic)                       | T40·4                                                                                                               |
| Poisoning- Unspecified substances                    | T50·9, X44, Y14                                                                                                     |
| Polysubstance abuse/dependence                       | F19·1, F19·2, F19·9                                                                                                 |
| Respiratory failure                                  | J80, J96·0, J96·9, J98·9, R09·2                                                                                     |
| Seizure                                              | R56·8                                                                                                               |
| Self-harm (suicide)                                  | T71, T75·1, X70, X71                                                                                                |
| Stroke/bleed/Pulmonary embolism                      | I26·9, I60·9, I62·0                                                                                                 |
| Tobacco abuse/dependence                             | F17·9                                                                                                               |
| Trauma/accidental injury                             | S01·8, S01·9, S06·8, S09·9, S19·9, S31·8, S36·0, S39·9, T01·9, T09·9, T14·1, T14·9, T30·0, V09·2, V89·2, X00, X59·9 |

|         |                 |
|---------|-----------------|
| Wasting | E46, R62-8, R64 |
|---------|-----------------|

**Supplementary Table 2. Primary and secondary causes of death among people with HIV formerly incarcerated in an integrated prison system, 2007-2014, for deaths with cause available (N=170)**

| Primary cause of death<br>Secondary causes of death <sup>a</sup>       | Number of deaths/number<br>of deaths in (sub)category | %     |
|------------------------------------------------------------------------|-------------------------------------------------------|-------|
| HIV/AIDS                                                               | 78/170                                                | 45.9% |
| Opportunistic infection/condition <sup>b</sup>                         | 44/78                                                 | 56.4% |
| Liver disease, failure or viral hepatitis <sup>c</sup>                 | 30/78                                                 | 38.5% |
| Cardiac arrest                                                         | 17/78                                                 | 21.8% |
| Respiratory failure                                                    | 17/78                                                 | 21.8% |
| Cardiovascular disease                                                 | 14/78                                                 | 18.0% |
| Kidney disease or failure                                              | 9/78                                                  | 11.5% |
| Wasting                                                                | 5/78                                                  | 6.4%  |
| Hemorrhage                                                             | 5/78                                                  | 6.4%  |
| Acidosis                                                               | 4/78                                                  | 5.1%  |
| Polysubstance abuse or dependence                                      | 3/78                                                  | 3.9%  |
| Tobacco abuse or dependence                                            | 2/78                                                  | 2.6%  |
| Hematologic disorder                                                   | 2/78                                                  | 2.6%  |
| Malignancy (other)                                                     | 2/78                                                  | 2.6%  |
| Brain damage                                                           | 2/78                                                  | 2.6%  |
| Alcohol abuse or dependence                                            | 1/78                                                  | 1.3%  |
| Lung disease other than malignancy                                     | 1/78                                                  | 1.3%  |
| Crohn's disease                                                        | 1/78                                                  | 1.3%  |
| Disseminated intravascular coagulation                                 | 1/78                                                  | 1.3%  |
| Hypotension                                                            | 1/78                                                  | 1.3%  |
| Dementia                                                               | 1/78                                                  | 1.3%  |
| Diabetes                                                               | 1/78                                                  | 1.3%  |
| Seizure                                                                | 1/78                                                  | 1.3%  |
| Drug overdose                                                          | 26/170                                                | 15.3% |
| Polysubstance abuse or dependence <sup>d</sup>                         | 13/26                                                 | 50.0% |
| Opioid poisoning <sup>e</sup>                                          | 18/26                                                 | 69.2% |
| Cocaine poisoning                                                      | 12/26                                                 | 46.2% |
| Alcohol poisoning                                                      | 5/26                                                  | 19.2% |
| Cardiovascular disease                                                 | 4/26                                                  | 15.4% |
| Poisoning from unspecified substances                                  | 3/26                                                  | 11.5% |
| Benzodiazepine poisoning                                               | 1/26                                                  | 3.9%  |
| Methadone poisoning                                                    | 1/26                                                  | 3.9%  |
| HIV                                                                    | 1/26                                                  | 3.9%  |
| Lung disease other than malignancy                                     | 1/26                                                  | 3.9%  |
| Liver disease, failure, and/or viral hepatitis                         | 17/170                                                | 10.0% |
| Liver disease or failure, general                                      | 14/17                                                 | 82.4% |
| Chronic Hepatitis C                                                    | 7/17                                                  | 41.2% |
| Hepatocellular carcinoma                                               | 5/17                                                  | 29.4% |
| HIV                                                                    | 4/17                                                  | 23.5% |
| Hemorrhage (gastrointestinal), hyperkalemia, and/or coagulation defect | 4/17                                                  | 23.5% |
| Diabetes                                                               | 2/17                                                  | 11.8% |
| Kidney disease or failure                                              | 2/17                                                  | 11.8% |
| Respiratory failure                                                    | 2/17                                                  | 11.8% |
| Septicemia                                                             | 2/17                                                  | 11.8% |
| Cardiac arrest                                                         | 1/17                                                  | 5.9%  |
| Cardiovascular disease                                                 | 1/17                                                  | 5.9%  |
| Polysubstance abuse or dependence                                      | 1/17                                                  | 5.9%  |
| Acute Hepatitis B                                                      | 1/17                                                  | 5.9%  |
| Pneumonia                                                              | 1/17                                                  | 5.9%  |
| Cardiovascular disease                                                 | 16/170                                                | 9.4%  |
| Heart disease <sup>f</sup>                                             | 11/16                                                 | 68.8% |
| Cardiac arrest                                                         | 7/16                                                  | 43.8% |
| Liver disease, failure, and/or viral hepatitis <sup>g</sup>            | 3/16                                                  | 18.8% |
| Aortic dissection                                                      | 2/16                                                  | 12.5% |
| HIV                                                                    | 2/16                                                  | 12.5% |
| Wasting                                                                | 2/16                                                  | 12.5% |
| Endocarditis                                                           | 1/16                                                  | 6.3%  |
| Cardiogenic shock                                                      | 1/16                                                  | 6.3%  |
| Stroke/pulmonary embolism                                              | 1/16                                                  | 6.3%  |
| Diabetes                                                               | 1/16                                                  | 6.3%  |
| Lung disease (other than malignancy)                                   | 1/16                                                  | 6.3%  |

|                                           |        |       |
|-------------------------------------------|--------|-------|
| Malignancy (other)                        | 1/16   | 6.3%  |
| Tobacco abuse or dependence               | 1/16   | 6.3%  |
| Accidental injury, suicide, or homicide   | 13/170 | 7.6%  |
| Homicide                                  | 5/13   | 38.5% |
| Accidental injury                         | 4/13   | 30.8% |
| Exposure (hypothermia)                    | 2/13   | 15.4% |
| Suicide                                   | 2/13   | 15.4% |
| Cocaine poisoning                         | 1/13   | 7.7%  |
| Alcohol abuse or dependence               | 1/13   | 7.7%  |
| Other primary cause of death <sup>h</sup> | 20/170 | 11.8% |
| Kidney disease or failure                 | 6/20   | 30.0% |
| Cardiac arrest                            | 6/20   | 30.0% |
| Malignancy, non-AIDS-related              | 4/20   | 20.0% |
| Diabetes                                  | 4/20   | 20.0% |
| Cardiovascular disease                    | 3/20   | 15.0% |
| Lung disease, other than malignancy       | 3/20   | 15.0% |
| Respiratory failure                       | 3/20   | 15.0% |
| Endocarditis                              | 2/20   | 10.0% |
| Tobacco abuse or dependence               | 2/20   | 10.0% |
| HIV                                       | 2/20   | 10.0% |
| Liver disease or failure, general         | 1/20   | 5.0%  |
| Seizure                                   | 1/20   | 5.0%  |
| Tuberculosis                              | 1/20   | 5.0%  |

<sup>a</sup> Categories for secondary causes of death are not mutually exclusive and should not be expected to sum to 100%

<sup>b</sup> Includes deaths from: septicemia (16), pneumonia or pneumonitis (7), unspecified bacterial infection AIDS-related (7), non-Hodgkins lymphoma (6), malignancy AIDS-related (4), cryptococcus (3), progressive multifocal leukoencephalopathy (3), candidiasis (2), mycobacteria (2), unspecified infection AIDS-related (2), aspergillosis (1), pneumocystosis (1), mycosis (1), herpes (1), Kaposi's sarcoma (1)

<sup>c</sup> Includes deaths from: general liver disease or failure (18), chronic Hepatitis C (21), acute Hepatitis B (1), hepatocellular carcinoma (1), alcohol-related cirrhosis (1), hepatorenal syndrome (1)

<sup>d</sup> Includes deaths from: cocaine (10), heroin (5), other opioids (6), alcohol (2)

<sup>e</sup> Includes deaths from: heroin (11), other opioids (11)

<sup>f</sup> Includes deaths from: myocardial infarction, congestive heart failure, hypertension

<sup>g</sup> Includes deaths from one case of chronic Hepatitis C virus.

<sup>h</sup> Each with <5 deaths in each category, includes deaths from: diabetes (4), malignancy (4), endocarditis (2), respiratory failure (2), kidney disease or failure (2), lung disease (2), gastrointestinal complications (hemoperitoneum, gallbladder disease; 2), unspecified (2)

**Supplementary Table 3. Characteristics of all 1,350 individuals and their incarceration experiences, stratified based on the frequency of transitional case management (TCM) services provided during follow-up<sup>a</sup>**

|                                                           | 0<br>visits/year<br>n=620 (45.9%) | >0-2 visits/year<br>n=233 (17.3%) | 3-4 visits/year<br>n=146 (10.8%) | ≥5 visits/year<br>n=351 (14.7%) | p-value           |
|-----------------------------------------------------------|-----------------------------------|-----------------------------------|----------------------------------|---------------------------------|-------------------|
| Death from any cause                                      |                                   |                                   |                                  |                                 |                   |
| No                                                        | 512 (82.6%)                       | 213 (91.4%)                       | 132 (90.4%)                      | 309 (88.0%)                     | <b>0.002</b>      |
| Yes                                                       | 108 (17.4%)                       | 20 (8.6%)                         | 14 (9.6%)                        | 42 (12.0%)                      |                   |
| <b>Predisposing factors</b>                               |                                   |                                   |                                  |                                 |                   |
| <b>Age at time of index release</b>                       |                                   |                                   |                                  |                                 |                   |
| 18-29                                                     | 51 (8.2%)                         | 19 (8.2%)                         | 15 (10.3%)                       | 29 (8.3%)                       | <b>0.03</b>       |
| 30-39                                                     | 106 (17.1%)                       | 44 (18.9%)                        | 39 (26.7%)                       | 64 (18.2%)                      |                   |
| 40-49                                                     | 277 (44.7%)                       | 99 (42.5%)                        | 60 (41.1%)                       | 181 (51.6%)                     |                   |
| ≥ 50                                                      | 186 (30.0%)                       | 71 (30.5%)                        | 32 (21.9%)                       | 77 (21.9%)                      |                   |
| <b>Gender<sup>b</sup></b>                                 |                                   |                                   |                                  |                                 |                   |
| Female                                                    | 163 (26.3%)                       | 42 (18.0%)                        | 28 (19.2%)                       | 74 (21.1%)                      | <b>0.03</b>       |
| Male                                                      | 457 (73.7%)                       | 191 (82.0%)                       | 118 (80.8%)                      | 277 (78.9%)                     |                   |
| <b>Race/Ethnicity</b>                                     |                                   |                                   |                                  |                                 |                   |
| White                                                     | 124 (20.0%)                       | 45 (19.3%)                        | 24 (16.4%)                       | 57 (16.2%)                      | 0.73              |
| Black                                                     | 251 (40.5%)                       | 94 (40.3%)                        | 66 (45.2%)                       | 146 (41.6%)                     |                   |
| Hispanic                                                  | 218 (35.2%)                       | 86 (36.9%)                        | 53 (36.3%)                       | 138 (39.3%)                     |                   |
| Other                                                     | 27 (4.4%)                         | 8 (3.4%)                          | 3 (2.1%)                         | 10 (2.9%)                       |                   |
| <b>Education level</b>                                    |                                   |                                   |                                  |                                 |                   |
| < High school                                             | 285 (46.0%)                       | 90 (38.6%)                        | 57 (39.0%)                       | 178 (50.7%)                     | <b>0.01</b>       |
| ≥ High school                                             | 335 (54.0%)                       | 143 (61.4%)                       | 89 (61.0%)                       | 173 (49.3%)                     |                   |
| <b>Marital status<sup>c</sup></b>                         |                                   |                                   |                                  |                                 |                   |
| Not married                                               | 481 (82.1%)                       | 182 (81.6%)                       | 117 (84.2%)                      | 306 (89.7%)                     | <b>0.01</b>       |
| Married                                                   | 105 (17.9%)                       | 41 (18.4%)                        | 22 (15.8%)                       | 35 (10.3%)                      |                   |
| <b>Injection drug use-related HIV transmission</b>        |                                   |                                   |                                  |                                 |                   |
| No                                                        | 184 (29.7%)                       | 68 (29.2%)                        | 51 (34.9%)                       | 104 (29.6%)                     | 0.62              |
| Yes                                                       | 436 (70.3%)                       | 165 (70.8%)                       | 95 (65.1%)                       | 247 (70.4%)                     |                   |
| <b>CD4 count at time of diagnosis<sup>d</sup></b>         |                                   |                                   |                                  |                                 |                   |
| ≥ 500 cells/mL                                            | 166 (27.3%)                       | 63 (27.3%)                        | 39 (26.7%)                       | 90 (25.6%)                      | 0.35              |
| 200-499 cells/mL                                          | 326 (53.5%)                       | 120 (52.0%)                       | 90 (61.6%)                       | 197 (56.1%)                     |                   |
| < 200 cells/mL                                            | 117 (19.2%)                       | 48 (20.8%)                        | 17 (11.6%)                       | 64 (18.2%)                      |                   |
| <b>Years since HIV diagnosis at time of index release</b> |                                   |                                   |                                  |                                 |                   |
| Median<br>(interquartile range)                           | 11.4<br>(5.6-17.1)                | 11.5<br>(5.8-16.8)                | 9.8<br>(4.0-16.4)                | 11.7<br>(5.6-17.3)              | 0.24              |
| <b>HIV diagnosed during last incarceration</b>            |                                   |                                   |                                  |                                 |                   |
| No                                                        | 600 (96.8%)                       | 222 (95.3%)                       | 133 (91.1%)                      | 327 (93.2%)                     | <b>0.01</b>       |
| Yes                                                       | 20 (3.2%)                         | 11 (4.7%)                         | 13 (8.9%)                        | 24 (6.8%)                       |                   |
| <b>Enabling or disabling factors</b>                      |                                   |                                   |                                  |                                 |                   |
| <b>Length of index incarceration</b>                      |                                   |                                   |                                  |                                 |                   |
| ≤ 30 days                                                 | 274 (44.2%)                       | 62 (26.6%)                        | 30 (20.6%)                       | 88 (25.1%)                      | <b>&lt;0.0001</b> |
| 31-364 days                                               | 284 (45.8%)                       | 120 (51.5%)                       | 93 (63.7%)                       | 200 (57.0%)                     |                   |
| ≥ 365 days                                                | 62 (10.0%)                        | 51 (21.9%)                        | 23 (15.8%)                       | 63 (18.0%)                      |                   |
| <b>Conditions of index release</b>                        |                                   |                                   |                                  |                                 |                   |
| Unconditional                                             | 136 (21.9%)                       | 65 (27.9%)                        | 42 (28.8%)                       | 108 (30.8%)                     | <b>0.001</b>      |
| Conditional                                               | 357 (57.6%)                       | 138 (59.2%)                       | 90 (61.6%)                       | 198 (56.4%)                     |                   |
| Bonded                                                    | 127 (20.5%)                       | 30 (12.9%)                        | 14 (9.6%)                        | 45 (12.8%)                      |                   |
| <b>Year of index release</b>                              |                                   |                                   |                                  |                                 |                   |
| 2007-2008                                                 | 257 (41.5%)                       | 134 (57.5%)                       | 63 (43.2%)                       | 141 (40.2%)                     | <b>&lt;0.0001</b> |
| 2009-2010                                                 | 177 (28.6%)                       | 60 (25.8%)                        | 56 (38.4%)                       | 95 (27.1%)                      |                   |
| 2011-2012                                                 | 101 (16.3%)                       | 31 (13.3%)                        | 19 (13.0%)                       | 60 (17.1%)                      |                   |
| 2013-2014                                                 | 85 (13.7%)                        | 8 (3.4%)                          | 8 (5.5%)                         | 55 (15.7%)                      |                   |
| <b>Health insurance during follow-up</b>                  |                                   |                                   |                                  |                                 |                   |
| Consistently uninsured                                    | 269 (38.0%)                       | 35 (28.6%)                        | 24 (16.4%)                       | 37 (10.5%)                      | <b>&lt;0.0001</b> |
| Consistently insured                                      | 314 (56.8%)                       | 126 (56.5%)                       | 52 (35.6%)                       | 145 (41.3%)                     |                   |
| Intermittently insured                                    | 37 (5.2%)                         | 72 (15.0%)                        | 70 (48.0%)                       | 169 (48.2%)                     |                   |
| <b>Linked to care within 14 days after index release</b>  |                                   |                                   |                                  |                                 |                   |
| No                                                        | 509 (82.1%)                       | 183 (78.5%)                       | 117 (80.1%)                      | 267 (76.1%)                     | 0.15              |
| Yes                                                       | 111 (17.9%)                       | 50 (21.5%)                        | 29 (19.9%)                       | 84 (23.9%)                      |                   |

|                                                                        |               |               |                  |                  |         |
|------------------------------------------------------------------------|---------------|---------------|------------------|------------------|---------|
| <b>Transitional case management during index release</b>               |               |               |                  |                  |         |
| No                                                                     | 613 (98.9%)   | 125 (53.7%)   | 97 (66.4%)       | 175 (49.9%)      | <0.0001 |
| Yes                                                                    | 7 (1.1%)      | 108 (46.4%)   | 49 (33.6%)       | 176 (50.1%)      |         |
| <b>Re-incarceration rate</b>                                           |               |               |                  |                  |         |
| Median (interquartile range)                                           | 0.00 (0.0-28) | 0.19 (0.0-42) | 0.37 (0.22-0.59) | 0.51 (0.16-0.86) | <0.001  |
| <b>Re-incarcerated for ≥365 days</b>                                   |               |               |                  |                  |         |
| No                                                                     | 562 (90.7%)   | 186 (79.8%)   | 98 (67.1%)       | 246 (70.1%)      | <0.0001 |
| Yes                                                                    | 58 (9.4%)     | 47 (20.2%)    | 48 (32.9%)       | 105 (29.9%)      |         |
| <b>Percentage of total follow-up time spent re-incarcerated</b>        |               |               |                  |                  |         |
| 0-1%                                                                   | 398 (64.2%)   | 94 (40.3%)    | 23 (15.8%)       | 90 (25.6%)       | <0.0001 |
| 2-10%                                                                  | 98 (15.8%)    | 55 (23.6%)    | 37 (25.3%)       | 35 (10.0%)       |         |
| 11-25%                                                                 | 55 (8.9%)     | 32 (13.7%)    | 33 (22.6%)       | 76 (21.7%)       |         |
| 26-50%                                                                 | 43 (6.9%)     | 36 (15.5%)    | 40 (27.4%)       | 100 (28.5%)      |         |
| 51-100%                                                                | 26 (4.2%)     | 16 (6.9%)     | 13 (8.9%)        | 50 (14.3%)       |         |
| <b>Length of last incarceration</b>                                    |               |               |                  |                  |         |
| ≤ 30 days                                                              | 227 (36.6%)   | 44 (18.9%)    | 16 (11.0%)       | 60 (17.1%)       | <0.0001 |
| 31-364 days                                                            | 315 (50.8%)   | 132 (56.7%)   | 96 (65.8%)       | 226 (64.4%)      |         |
| ≥ 365 days                                                             | 78 (12.6%)    | 57 (24.5%)    | 34 (23.3%)       | 65 (18.5%)       |         |
| <b>Conditions of last incarceration</b>                                |               |               |                  |                  |         |
| Unconditional                                                          | 43 (6.9%)     | 33 (14.2%)    | 24 (16.4%)       | 60 (17.1%)       | <0.0001 |
| Conditional                                                            | 121 (19.5%)   | 54 (23.2%)    | 42 (28.8%)       | 74 (21.1%)       |         |
| Bonded                                                                 | 372 (60.0%)   | 128 (54.9%)   | 74 (50.7%)       | 196 (55.8%)      |         |
| Re-incarcerated                                                        | 84 (13.6%)    | 18 (7.7%)     | 6 (4.1%)         | 21 (6.0%)        |         |
| <b>Need factors</b>                                                    |               |               |                  |                  |         |
| <b>Prescribed ART during index incarceration</b>                       |               |               |                  |                  |         |
| No                                                                     | 310 (50.0%)   | 93 (39.9%)    | 65 (44.5%)       | 122 (34.8%)      | <0.0001 |
| Yes                                                                    | 310 (50.0%)   | 140 (60.1%)   | 81 (55.5%)       | 229 (65.2%)      |         |
| <b>Virally suppressed prior to index release</b>                       |               |               |                  |                  |         |
| No/viral level not reported                                            | 256 (41.3%)   | 105 (45.1%)   | 77 (52.7%)       | 150 (42.7%)      | 0.003   |
| Yes                                                                    | 188 (30.3%)   | 84 (36.1%)    | 39 (26.7%)       | 131 (37.3%)      |         |
| Viral load not drawn prior to release                                  | 176 (28.4%)   | 44 (18.9%)    | 30 (20.6%)       | 70 (19.9%)       |         |
| <b>Number of medical co-morbidities during index incarceration</b>     |               |               |                  |                  |         |
| 0                                                                      | 405 (65.3%)   | 138 (59.2%)   | 94 (64.4%)       | 201 (57.3%)      | 0.24    |
| 1                                                                      | 122 (19.7%)   | 53 (22.8%)    | 29 (19.9%)       | 90 (25.6%)       |         |
| ≥ 2                                                                    | 93 (15.0%)    | 42 (18.0%)    | 23 (15.8%)       | 60 (17.1%)       |         |
| <b>Psychiatric need during index incarceration</b>                     |               |               |                  |                  |         |
| Low severity score, untreated                                          | 314 (50.7%)   | 118 (50.6%)   | 73 (50.0%)       | 145 (41.3%)      | 0.16    |
| Low severity score, treated                                            | 119 (19.2%)   | 38 (16.3%)    | 30 (20.6%)       | 69 (19.7%)       |         |
| High severity score, untreated                                         | 26 (4.2%)     | 7 (3.0%)      | 6 (4.1%)         | 19 (5.4%)        |         |
| High severity score, treated                                           | 161 (26.0%)   | 70 (30.0%)    | 37 (25.3%)       | 118 (33.6%)      |         |
| <b>Addiction severity score during index incarceration<sup>e</sup></b> |               |               |                  |                  |         |
| Low severity/no disorder (score 1-2)                                   | 93 (15.4%)    | 44 (19.3%)    | 26 (17.9%)       | 57 (16.6%)       | 0.75    |
| Moderate severity disorder (score 3)                                   | 391 (64.8%)   | 146 (64.0%)   | 95 (65.5%)       | 229 (66.6%)      |         |
| Serious disorder (score 4-5)                                           | 119 (19.7%)   | 38 (16.7%)    | 24 (16.6%)       | 58 (16.9%)       |         |
| <b>Treated for an opioid use disorder during index incarceration</b>   |               |               |                  |                  |         |
| No                                                                     | 614 (99.0%)   | 232 (99.6%)   | 146 (100%)       | 349 (99.4%)      | 0.77    |
| Yes                                                                    | 6 (1.0%)      | 1 (0.4%)      | 0 (0%)           | 2 (0.6%)         |         |



|                                                                                              |             |             |             |             |                   |
|----------------------------------------------------------------------------------------------|-------------|-------------|-------------|-------------|-------------------|
| <b>Percentage of all re-incarcerations during which ART was prescribed</b>                   |             |             |             |             |                   |
| Never re-incarcerated                                                                        | 357 (57.6%) | 79 (33.9%)  | 22 (15.1%)  | 77 (21.9%)  | <b>&lt;0.0001</b> |
| 0-10%                                                                                        | 73 (11.8%)  | 23 (9.9%)   | 13 (8.9%)   | 19 (5.4%)   |                   |
| 11-50%                                                                                       | 31 (5.0%)   | 21 (9.0%)   | 18 (12.3%)  | 27 (7.7%)   |                   |
| 51-90%                                                                                       | 20 (3.2%)   | 14 (6.0%)   | 21 (14.4%)  | 46 (13.1%)  |                   |
| 91-100%                                                                                      | 139 (22.4%) | 96 (41.2%)  | 72 (49.3%)  | 182 (51.9%) |                   |
| <b>Percentage of all re-incarcerations that ended in viral suppression</b>                   |             |             |             |             |                   |
| Never re-incarcerated                                                                        | 357 (57.6%) | 79 (33.9%)  | 22 (15.1%)  | 77 (21.9%)  | <b>&lt;0.0001</b> |
| 0-24%                                                                                        | 123 (19.8%) | 63 (27.0%)  | 40 (27.4%)  | 71 (20.2%)  |                   |
| 25-49%                                                                                       | 14 (2.3%)   | 16 (6.9%)   | 15 (10.3%)  | 38 (10.8%)  |                   |
| 50-74%                                                                                       | 37 (6.0%)   | 28 (12.0%)  | 34 (23.3%)  | 73 (20.8%)  |                   |
| 75-100%                                                                                      | 89 (14.4%)  | 47 (20.2%)  | 35 (24.0%)  | 92 (26.2%)  |                   |
| <b>Percentage of all re-incarcerations with change from virologic failure to suppression</b> |             |             |             |             |                   |
| Never re-incarcerated                                                                        | 357 (57.6%) | 79 (33.9%)  | 22 (15.1%)  | 77 (21.9%)  | <b>&lt;0.0001</b> |
| 0-24%                                                                                        | 206 (33.2%) | 110 (47.2%) | 80 (54.8%)  | 195 (55.6%) |                   |
| 25-49%                                                                                       | 17 (2.7%)   | 11 (4.7%)   | 14 (9.6%)   | 37 (10.5%)  |                   |
| 50-74%                                                                                       | 20 (3.2%)   | 19 (8.2%)   | 23 (15.8%)  | 24 (6.8%)   |                   |
| 75-100%                                                                                      | 20 (3.2%)   | 14 (6.0%)   | 7 (4.8%)    | 18 (5.1%)   |                   |
| <b>Prescribed ART during last incarceration</b>                                              |             |             |             |             |                   |
| No                                                                                           | 233 (37.6%) | 49 (21.0%)  | 27 (18.5%)  | 48 (13.7%)  | <b>&lt;0.0001</b> |
| Yes                                                                                          | 387 (62.4%) | 184 (79.0%) | 119 (81.5%) | 303 (86.3%) |                   |
| <b>Virally suppressed within 90 days prior to release from last incarceration</b>            |             |             |             |             |                   |
| No/viral level not reported                                                                  | 222 (35.8%) | 74 (31.8%)  | 42 (28.8%)  | 73 (20.8%)  | <b>&lt;0.0001</b> |
| Yes                                                                                          | 257 (41.5%) | 111 (47.6%) | 75 (51.4%)  | 210 (59.8%) |                   |
| Viral load not drawn prior to release                                                        | 141 (22.7%) | 48 (20.6%)  | 29 (19.9%)  | 68 (19.4%)  |                   |
| <b>Viral suppression status during last incarceration</b>                                    |             |             |             |             |                   |
| Never virally suppressed                                                                     | 216 (34.8%) | 68 (29.2%)  | 45 (30.8%)  | 69 (19.7%)  | <b>&lt;0.0001</b> |
| Failure, then suppression                                                                    | 90 (14.5%)  | 54 (23.2%)  | 36 (24.7%)  | 80 (22.8%)  |                   |
| Suppression, then failure                                                                    | 14 (2.3%)   | 11 (4.7%)   | 4 (2.7%)    | 9 (2.6%)    |                   |
| Consistent suppression                                                                       | 189 (30.5%) | 78 (33.5%)  | 55 (37.7%)  | 163 (46.4%) |                   |
| Viral load never drawn                                                                       | 111 (17.9%) | 22 (9.4%)   | 6 (4.1%)    | 30 (8.6%)   |                   |
| <b>Number of medical comorbidities during last incarceration</b>                             |             |             |             |             |                   |
| 0                                                                                            | 348 (56.1%) | 95 (40.8%)  | 60 (41.1%)  | 150 (42.7%) | <b>&lt;0.0001</b> |
| 1                                                                                            | 136 (21.9%) | 63 (27.0%)  | 39 (26.7%)  | 102 (29.1%) |                   |
| ≥ 2                                                                                          | 136 (21.9%) | 75 (32.2%)  | 47 (32.2%)  | 99 (28.2%)  |                   |
| <b>Psychiatric need during last incarceration</b>                                            |             |             |             |             |                   |
| Low severity score, untreated                                                                | 292 (47.1%) | 102 (43.8%) | 64 (43.8%)  | 131 (37.3%) | <b>0.03</b>       |
| Low severity score, treated                                                                  | 102 (16.5%) | 27 (11.6%)  | 15 (10.3%)  | 55 (15.7%)  |                   |
| High severity score, untreated                                                               | 41 (6.6%)   | 19 (8.2%)   | 13 (8.9%)   | 26 (7.4%)   |                   |
| High severity score, treated                                                                 | 185 (29.8%) | 85 (36.5%)  | 54 (37.0%)  | 139 (39.6%) |                   |
| <b>Addiction severity score during last incarceration<sup>f</sup></b>                        |             |             |             |             |                   |
| Low severity/no disorder (score 1-2)                                                         | 72 (11.8%)  | 18 (7.8%)   | 12 (8.2%)   | 20 (5.8%)   | <b>0.045</b>      |
| Moderate severity                                                                            |             |             |             |             |                   |

|                                                                                    |             |             |             |             |                   |
|------------------------------------------------------------------------------------|-------------|-------------|-------------|-------------|-------------------|
| disorder (score 3)                                                                 | 412 (67.7%) | 168 (72.7%) | 102 (69.9%) | 263 (76.0%) |                   |
| Serious disorder (score 4-5)                                                       | 125 (20.5%) | 45 (19.5%)  | 32 (21.9%)  | 63 (18.2%)  |                   |
| <b>Treated for an opioid use disorder during last incarceration</b>                |             |             |             |             |                   |
| No                                                                                 | 614 (99.0%) | 231 (99.1%) | 142 (97.3%) | 335 (95.4%) | <b>0.002</b>      |
| Yes                                                                                | 6 (1.0%)    | 2 (0.9%)    | 4 (2.7%)    | 16 (4.6%)   |                   |
| <b>Viral suppression and timing of last viral load drawn prior to death/censor</b> |             |             |             |             |                   |
| Viral suppression, within 6 months                                                 | 339 (54.7%) | 158 (67.8%) | 96 (65.8%)  | 247 (70.4%) | <b>&lt;0.0001</b> |
| Virologic failure, within 6 months                                                 | 107 (17.3%) | 26 (11.2%)  | 19 (13.0%)  | 56 (16.0%)  |                   |
| Viral suppression, >6 months                                                       | 81 (13.1%)  | 33 (14.2%)  | 16 (11.0%)  | 30 (8.6%)   |                   |
| Virologic failure, >6 months                                                       | 50 (8.1%)   | 12 (5.2%)   | 14 (9.6%)   | 11 (3.1%)   |                   |
| Viral load never drawn                                                             | 43 (6.9%)   | 4 (1.7%)    | 1 (0.7%)    | 7 (2.0%)    |                   |

<sup>a</sup> Total sample n=1350 individuals. For categorical variables, numbers listed are column n (%) and *p*-values are generated from chi-squared tests or, for tables with at least one cell n<5, fisher's exact tests generated using Monte Carlo estimations based on n=20,000 randomly chosen tables. For variables modeled as continuous, numbers listed are median (interquartile range) and *p*-values are generated from Kruskal-Wallis tests. Percentages may not sum to 100% due to rounding.

<sup>b</sup> Incarceration periods for transgender males (n=1) and transgender females (n=3) have been included in the male and female categories, respectively.

<sup>c</sup> Marital status was not reported for 61 individuals.

<sup>d</sup> CD4 count at time of HIV diagnosis was unavailable for 13 individuals.

<sup>e</sup> Addiction severity score was not assessed and thus unavailable for 30 individuals' index incarceration periods.

<sup>f</sup> Addiction severity score was not assessed and thus unavailable for 18 individuals' last incarceration periods.
